# Supplementary material for: Prevalence and Associated Factors of Person-Centred Maternity Care Among Women Who Gave Birth in Public Hospitals of West Arsi Zone, Oromia, Ethiopia, 2023
Source: Research Square preprint supplement (doi:10.21203/rs.3.rs-6535872/v1), 2025-06-02
Supplement: Supplementary file 1 [file 4ca5b64c227295c22d9d0cb2.docx]

# Annex II: English Version Questionnaires for Client Interview

The Questioners to assessPerson-Centered Maternity Care and Associated Factors among women who gave birth at Public Hospital in West Arsi, Zone Ethiopia 2023

| Sub city **-------------------** | Interviewer name **----------------** sign **-----------** |
| --- | --- |
| Keble **-------------------** | Supervisor name **---------------**sign **----------** |
|  | Date **--------------------** |

# This questionnaire was prepared to gather information on socio-demographic and economic profile, obstetric information, person-centered maternity care and health facilities and professions

# Part I: Socio economic and demographic profile of the study participants

| **S. No.** | **Questions** | **Responses** |  |
| --- | --- | --- | --- |
| 101 | Residence | 1. Urban 2. Rural |  |
| 102 | Age in years | _________ |  |
| 103 | Marital status | 1. Single 2.Married 3.Widowed 4. Divorced |  |
| 104 | Mothers educational level | 1. Unable to read and write 2. Primary  3. Secondary 4.Certificate/Diploma 5. Degree and above |  |
| 105 | Mothers occupation | 1. Housewife 2.Privateemployee 3.Government employee 4.Merchant 5.Student |  |
| 106 | Average monthly income (ETB) | 1. <3000 2. 3001-4999 3. 5000-8000 4. >8000 |  |

# Part II: Obstetrics Characteristics

| S. No. | Questions | Responses |  |
| --- | --- | --- | --- |
| 201 | Have you followed antenatal care for the last pregnancy? | 1.Yes 2. No |  |
| 202 | How many times did you follow antenatal care? | 1. One 2.Two 3.Three 4. Four and above |  |
| 203 | Place of ANC? | 1. Hospital 2.HealthCenter 3. Private Clinic |  |
| 204 | No. of live births? | ___________ |  |
| 205 | The total number of facility-based childbirth? | ___________ |  |
| 206 | Type of last delivery | 1. Spontaneous vaginal delivery 2.Instrumental delivery 3. Cesarean delivery |  |
| 207 | The profession of delivery attendant | 1. Doctor 2.Midwife 3. Others |  |
| 208 | Sex of delivery provider | 1. Male 2.Female 3. Both |  |
| 209 | Time of delivery | 1. Daytime 2. Night time |  |
| 210 | Complication during delivery | 1. Yes, for mother 2. Yes, for neonate 3. Yes, for both the mother and neonate 4. No |  |
| 211 | Newborn outcome | 1. Alive 2. Dead |  |
| 212 | How many days did you stay in the hospital? | 1. One day 2.Twodays 3. More than two days to one week 4. More than a week |  |

Part III: Person-Centered Maternity Care Scale
Subscale 1: Dignity and Respect

| S. No. | Questions | Responses | Skip |
| --- | --- | --- | --- |
| 301 | Did the health care provider in the facility treat you with respect? | 0. No, never 1. Yes, a few times 2. Yes, most of the time 3. Yes, all the time |  |
| 302 | Did the health care provider in the facility treat you in a friendly manner? | 0. No, never 1. Yes, a few times 2. Yes, most of the time 3. Yes, all the time |  |
| 303 | Did you feel the health care providers shouted at you, scolded, insulted, threatened, or talked to you rudely? | 0. No, never 1. Yes, a few times 2. Yes, most of the time 3. Yes, all the time |  |
| 304 | Do you feel like you were treated roughly like pushed, beaten, slapped, pinched, or physically restrained? | 0. No, never 1. Yes, a few times 2. Yes, most of the time 3. Yes, all the time |  |
| 305 | Did you feel other people not involved in the care could hear the discussion with the health care provider? | 0. No, never 1. Yes, a few times 2. Yes, most of the time 3. Yes, all the time |  |
| 306 | Did you feel like your health information was or will be kept confidential in this facility? | 0. No, never 1. Yes, a few times 2. Yes, most of the time 3. Yes, all the time |  |

Subscale 2: Communication and Autonomy

| S. No. | Questions | Responses |  |
| --- | --- | --- | --- |
| 307 | During your time in the health facility, did the health care providers introduce themselves to you when they first come to see you? | 0. No, none of them 1. Yes, a few of them 2. Yes, most of them 3. Yes, all of them |  |
| 308 | Did the health care providers call you by your name? | 0. No, none of them 1. Yes, a few of them 2. Yes, most of them 3. Yes, all of them |  |
| 309 | Do you feel like the health care providers in the facility involved you in decisions about your care? | 0. No, never 1. Yes, few times 2. Yes, most of the time 3. Yes, all the time |  |
| 310 | Did the health care providers in the facility ask your permission/consent before doing procedures and examinations on you? | 0. No, never 1. Yes, a few times 2. Yes, most of the time 3. Yes, all the time |  |
| 311 | During the delivery, do you feel like you were able to be in the position of your choice? | 0. No, never 1. Yes, a few times 2. Yes, most of the time 3. Yes, all the time |  |
| 312 | Did the health care providers in the facility speak to you in a language you could understand? | 0. No, never 1. Yes, a few times 2. Yes, most of the time 3. Yes, all the time |  |
| 313 | Did the health care providers explain to you why they were doing examinations or procedures on you? | 0. No, never 1. Yes, a few times 2. Yes, most of the time 3. Yes, all the time |  |
| 314 | Did the health care providers explain to you why they were giving you any medicine? | 0. No, never 1. Yes, a few times 2. Yes, most of the time 3. Yes, all the time |  |
| 315 | Do you feel you could ask the health care providers in the hospital any questions you had? | 0. No, never 1. Yes, a few times 2. Yes, most of the time 3. Yes, all the time |  |

Subscale 3: Supportive Care

| S. No. | Questions | Responses |  |  | | |
| --- | --- | --- | --- | --- | --- | --- |
| 316 | Were you allowed to have someone you wanted such as family or friends to stay with you during labor? | 0. No, never 1. Yes, a few times 2. Yes, most of the time 3. Yes, all the time |  |
| 317 | Were you allowed to have someone you wanted to stay with you during delivery? | 0. No, never 1. Yes, a few times 2. Yes, most of the time 3. Yes, all the time |  |  | | |
| 318 | Did the health care providers in the facility talk to you about how you were feeling? | 0. No, never 1. Yes, a few times 2. Yes, most of the time 3. Yes, all the time |  |
| 319 | Did the health care providers in the facility support your anxieties and fears? | 0. No, never 1. Yes, a few times 2. Yes, most of the time 3. Yes, all the time |  |
| 320 | Did you feel the health care providers did everything they could to help manage your pain? | 0. No, never 1. Yes, a few times 2. Yes, most of the time  3.yes,all the time |  |
|  |
| 321 | When you need help, did you feel the health care providers in the facility paid attention? | 0. No, never 1. Yes, a few times 2. Yes, most of the time 3. Yes, all the time |  |  | | |
| 322 | Did you feel the health care providers in the health facility took the best care for you? | 0. No, never 1. Yes, a few times 2. Yes, most of the time 3. Yes, all the time |  |  | | |
| 323 | Did you feel you could completely trust the health care providers in the health facility with regards to your care? | 0. No, never 1. Yes, a few times 2. Yes, most of the time 3. Yes, all the time |  |  | | |
| 324 | Do you think there were enough providers to care for you in the facility? | 0. No, never 1. Yes, a few times 2. Yes, most of the time 3. Yes, all the time |  |  | | |
| 325 | Did you feel like the facility was crowded? | 0. No, never 1. Yes, a few times 2. Yes, most of the time 3. Yes, all the time |  |  | | |
| 326 | Was there water in the hospital? | 0. No, never 1. Yes, a few times 2. Yes, most of the time 3. Yes, all the time |  |  | | |
| 327 | Was there electricity in the hospital? | 0. No, never 1. Yes, a few times 2. Yes, most of the time 3. Yes, all the time |  |  |  | | | |
| 328 | Do you say you feel safe in the facility | 1.No, never  2. Yes, a few times  3. Yes, most of the time 4. Yes, all the time |  |  | |  | | | |
| 329 | What is you’re feeling about waiting time? | 0. Very long 1. Somewhat long 2. Little long 3. Very short |  |  | | | |  | | |
| 330 | Thinking about the general environment of the health facility; the facility was clean? | 0. Very dirty 1. Dirty 2. Clean 3. Very clean |  |  | | | |
